# Supplementary material for: Bimodal function of chromatin remodeler Hmga1 in neural crest induction and Wnt-dependent emigration
Source: eLife. 2020 Sep 23;9:e57779. doi: 10.7554/eLife.57779 (PMC7591248; doi:10.7554/eLife.57779)
Supplement: Figure 3—source data 1. [file elife-57779-fig3-data1.xlsx]

## Sheet: Sheet1
Figure 3H: Hmga1 HCR intensity whole mount embryos compared between Control and Hmga1-knockout sides.
	Integrated Density (Control)	Integrated Density (Hmga1 Knockout)	Mean background intensity	Area	Control CTCF	Knockout CTCF	Ratio (KO/Ctrl)
E1	26102333	18609575	51.7663	105439	20644119	14069727	0.681537
E2	807955924	578145297	2553.17	170772	371944746	265430255	0.713628
E3	73122170	48131915	61.5213	206548	60415060	37742807	0.624725
E4	1903.35	1519.96	0.0356667	106.364	1899.56	1516.5	0.798346
E5	11382168	10286694	47.4167	63234.5	8.3838e+06	7.38016e+06	0.880288
		Statistics:
		Wilcoxon signed rank test
		V = 15, p-value = 0.03125
		alternative hypothesis: true location shift is greater than 0
