# Supplementary material for: Bimodal function of chromatin remodeler Hmga1 in neural crest induction and Wnt-dependent emigration
Source: eLife. 2020 Sep 23;9:e57779. doi: 10.7554/eLife.57779 (PMC7591248; doi:10.7554/eLife.57779)
Supplement: Figure 3—source data 2. [file elife-57779-fig3-data2.xlsx]

## Sheet: Sheet1
Figure 3G: Pax7-positive cell counts in whole mount embryos compared between Control and Hmga1-knockout sides.
	Pax7-positive cell count (Control)	Pax7-positive cell count (Hmga1 Knockout)	Knockout/Control Ratio
E1	961	717	0.746098
E2	968	774	0.799587
E3	751	641	0.853529
E4	440	396	0.9
E5	988	952	0.963563
E6	1036	888	0.857143
E7	859	584	0.67986
E8	919	608	0.661589
E9	1107	881	0.795845
E10	597	280	0.469012
E11	435	313	0.71954
	Statistics:
	Student’s t-test
	t = -6.1214, df = 10, p-value = 5.624e-05
	alternative hypothesis: true difference in means is less than 0
	95 percent confidence interval:
	-Inf -129.7119
	sample estimates:
	mean of the differences
	-184.273
