# Supplementary material for: Bimodal function of chromatin remodeler Hmga1 in neural crest induction and Wnt-dependent emigration
Source: eLife. 2020 Sep 23;9:e57779. doi: 10.7554/eLife.57779 (PMC7591248; doi:10.7554/eLife.57779)
Supplement: Figure 4—figure supplement 1—source data 1. [file elife-57779-fig4-figsupp1-data1.xlsx]

## Sheet: Sheet1
Figure 4 – figure supplement 1H: Pax7, Cleaved-caspase-3, and phospho-histone-H3 corrected total cell fluorescence intensity in transverse sections through the neural plate border compared between Control and Hmga1-RNP-knockout sides.
	Cleaved Caspase 3 intensity (CTCF) Control	Cleaved Caspase 3 intensity (CTCF) Hmga1 Knockout	Cleaved Caspase 3 Knockout/Control Ratio	Phospho histone H3 intensity (CTCF) Control	Phospho histone H3 intensity (CTCF) Hmga1 Knockout	Phospho histone H3 Knockout/Control Ratio	Pax7 intensity (CTCF) Control	Pax7 intensity (CTCF) Hmga1 Knockout	Pax7 Knockout/Control Ratio
E1	27.2909	21.9974	0.806033	2.46961	2.57849	1.04409	119.084	67.8592	0.569841
E2	11.8706	7.95154	0.669852	5.43917	4.87595	0.896452	57.7799	24.7993	0.429203
E4	44.5208	48.2597	1.08398	3.11205	5.65419	1.81687	85.2638	11.3433	0.133038
E5	232.622	198.636	0.8539	2.15833	3.07784	1.42603	26.4561	16.5901	0.627081
E6	6.54113	8.6612	1.32411	8.48293	11.0609	1.3039	160.678	93.221	0.580172
	Paired t-test				Paired t-test				Paired t-test
	data: Cleaved Caspase 3				data: Phospho histone H3				data: Pax7
	t = 1.0904, df = 4, p-value = 0.1684				t = -1.7614, df = 4, p-value = 0.07648				t = 4.0257, df = 4, p-value = 0.007895
	alternative hypothesis: true difference in means is greater than 0				alternative hypothesis: true difference in means is less than 0				alternative hypothesis: true difference in means is greater than 0
	95 percent confidence interval:				95 percent confidence interval:				95 percent confidence interval:
	-7.132121 Inf				-Inf 0.2349336				22.1532 Inf
	sample estimates:				sample estimates:				sample estimates:
	mean of the differences				mean of the differences				mean of the differences
	7.46792				-1.11705				47.0899
