# Supplementary material for: Bimodal function of chromatin remodeler Hmga1 in neural crest induction and Wnt-dependent emigration
Source: eLife. 2020 Sep 23;9:e57779. doi: 10.7554/eLife.57779 (PMC7591248; doi:10.7554/eLife.57779)
Supplement: Figure 4—source data 1. [file elife-57779-fig4-data1.xlsx]

## Sheet: Sheet1
Figure 4C: Pax7-positive cell counts in transverse sections through the midbrain and hindbrain compared between Control and Hmga1-knockout sides.
	Pax7-positive cells in Midbrain (Control)	Pax7-positive cells in Midbrain (Hmga1 Knockout)	Midbrain Ratio (KO/Ctrl)	Pax7-positive cells in Hindbrain (Control)	Pax7-positive cells in Hindbrain (Hmga1 Knockout)	Hindbrain Ratio (KO/Ctrl)
E1	32	33	1.03	19	14	0.74
E2	37	36	0.97	26	18	0.69
E3	11	9	0.82	37	31	0.84
E4	84	77	0.92	28	23	0.82
E5	35	35	1	50	18	0.36
	Statistics:
	Paired student’s t-test
	data: Midbrain vs Hindbrain ratios
	t = -2.3091, df = 4, p-value = 0.04106
	alternative hypothesis: true difference in means is less than 0
	95 percent confidence interval:
	-Inf -0.01980487
	sample estimates:
	mean of the differences
	-0.258
