# Supplementary material for: Bimodal function of chromatin remodeler Hmga1 in neural crest induction and Wnt-dependent emigration
Source: eLife. 2020 Sep 23;9:e57779. doi: 10.7554/eLife.57779 (PMC7591248; doi:10.7554/eLife.57779)
Supplement: Figure 4—source data 2. [file elife-57779-fig4-data2.xlsx]

## Sheet: Sheet1
Figure 4J: Pax7 corrected total cell fluorescence intensity in transverse sections through the neural plate border compared between Control and Hmga1-RNP-knockout sides.
	Pax7 intensity (CTCF) Control	Pax7 intensity (CTCF) Hmga1 Knockout
E1	119.084	67.8592
E2	57.7799	24.7993
E4	85.2638	11.3433
E5	26.4561	16.5901
E6	160.678	93.221
	Statistics:
	Paired t-test
	data: Control and Knockout
	t = 6.1641, df = 3, p-value = 0.004297
	alternative hypothesis: true difference in means is greater than 0
	95 percent confidence interval:
	34.86468 Inf
	sample estimates:
	mean of the differences
	56.3959
