# Supplementary material for: Bimodal function of chromatin remodeler Hmga1 in neural crest induction and Wnt-dependent emigration
Source: eLife. 2020 Sep 23;9:e57779. doi: 10.7554/eLife.57779 (PMC7591248; doi:10.7554/eLife.57779)
Supplement: Figure 4—source data 3. [file elife-57779-fig4-data3.xlsx]

## Sheet: Sheet1
Figure 4Q: Pax7 and Msx1 HCR corrected total cell fluorescence intensity in transverse sections through the neural plate border compared between Control and Hmga1-RNP-knockout sides.
	Pax7 HCR Intensity (CTCF) Control	Pax7 HCR Intensity (CTCF) Hmga1 Knockout	Pax7 Knockout/Control ratio		Msx1 HCR Intensity (CTCF) Control	Msx1 HCR Intensity (CTCF) Hmga1 Knockout	Msx1 Knockout/Control ratio
E1	877.76	458.841	0.522741		2218.58	1870.84	0.843259
E2	1768.57	561.99	0.317765		3530.21	3394.37	0.96152
E3	1298.02	770.715	0.59376		2395.73	1495.82	0.62437
E4	1610.84	978.223	0.607275
E5	2959.45	2264.73	0.765252
E6	1443.56	730.154	0.505801
Paired t-test					Paired t-test
data: Pax7 HCR					data: Msx1 HCR
t = 6.2918, df = 5, p-value = 0.0007456					t = 2.025, df = 2, p-value = 0.09007
alternative hypothesis: true difference in means is greater than 0					alternative hypothesis: true difference in means is greater than 0
95 percent confidence interval:					95 percent confidence interval:
475.0853 Inf					-203.8344 Inf
sample estimates:					sample estimates:
mean of the differences					mean of the differences
698.926					461.164
