# Supplementary material for: Bimodal function of chromatin remodeler Hmga1 in neural crest induction and Wnt-dependent emigration
Source: eLife. 2020 Sep 23;9:e57779. doi: 10.7554/eLife.57779 (PMC7591248; doi:10.7554/eLife.57779)
Supplement: Figure 5—source data 1. [file elife-57779-fig5-data1.xlsx]

## Sheet: Sheet1
Figure 5E: Pax7-positive cell counts in transverse sections through the hindbrain compared between Control and Hmga1-rescue sides.
	Pax7-positive cell count (Control)	Pax7-positive cell count (Hmga1 Rescue)	Rescue/Control Ratio
E1	835	828	0.991617
E2	749	741	0.989319
E3	413	392	0.949153
E4	590	564	0.955932
E5	617	580	0.940032
E6	802	678	0.845387
E7	344	333	0.968023
E8	601	560	0.93178
	Statistics:
	Welch Two Sample t-test
	t = -4.056, df = 12.967, p-value = 0.0006838
	alternative hypothesis: true difference in means is less than 0
	95 percent confidence interval:
	-Inf -0.1006093
	sample estimates:
	mean of x mean of y
	0.7677968 0.9464054
