# Supplementary material for: Bimodal function of chromatin remodeler Hmga1 in neural crest induction and Wnt-dependent emigration
Source: eLife. 2020 Sep 23;9:e57779. doi: 10.7554/eLife.57779 (PMC7591248; doi:10.7554/eLife.57779)
Supplement: Figure 6—source data 1. [file elife-57779-fig6-data1.xlsx]

## Sheet: Sheet1
Figure 6D: Ratio of Tcf/Lef:GFP-positive and RFP-positive cell counts in transverse sections through the midbrain compared between Control and Hmga1-knockout sides.
	Mean GFP/RFP Ctrl	Mean GFP/RFP KO	Normalized Ratio KO/Ctrl
E1	0.438	0.008	0.018
E2	0.421	0.177	0.421
E3	0.346	0.116	0.336
E4	0.512	0.255	0.499
E5	0.167	0.059	0.353
	Statistics:
	Two Sample t-test
	t = 3.4755, df = 8, p-value = 0.008374
	alternative hypothesis: true difference in means is not equal to 0
	95 percent confidence interval:
	0.08540422 0.42219578
	sample estimates:
	mean of x mean of y
	0.3768 0.1230
