# Supplementary material for: Bimodal function of chromatin remodeler Hmga1 in neural crest induction and Wnt-dependent emigration
Source: eLife. 2020 Sep 23;9:e57779. doi: 10.7554/eLife.57779 (PMC7591248; doi:10.7554/eLife.57779)
Supplement: Figure 6—source data 2. [file elife-57779-fig6-data2.xlsx]

## Sheet: Sheet1
Figure 6K: Ratio of neural crest cell migration area between experimental and control sides in whole mount embryos compared between Hmga1-knockout, ß-catenin-overexpression, and Hmga1-rescue conditions.
	Neural crest migration area Control	Neural crest migration area Hmga1 knockout	Knockout/Control ratio		Neural crest migration area Control	Neural crest migration area ß-catenin overexpression	ß-cat OE /Control ratio		Neural crest migration area Control	Neural crest migration area Hmga1 Rescue	Rescue/Control ratio
E1	146.463	87.679	0.598643	E2	97.733	97.952	1.00224	E1	59.425	62.751	1.05597
E2	130746	86130.7	0.658763	E3	80.888	89.899	1.1114	E2	106534	115986	1.08872
E3	85.968	63.249	0.735727	E5	85.285	80.407	0.942804	E6	144989	138316	0.953974
E4	75.158	43.519	0.579034	E7	55.738	56.258	1.00933	E7	48331.9	43066.9	0.891065
E5	38.222	24.19	0.632882					E8	82010.3	71254.9	0.868854
	Tukey multiple comparisons of means
	95% family-wise confidence level
	Fit: aov(formula = Ratio ~ Treatment, data = migration_area)
	$Treatment
	diff lwr upr p adj
	knockout-bactOE -0.373 -0.5173862 -0.2286138 0.0000637
	rescue-bactOE -0.043 -0.1873862 0.1013862 0.7081467
	rescue-knockout 0.330 0.1938714 0.4661286 0.0001128
