# Supplementary figures and images for: Bimodal function of chromatin remodeler Hmga1 in neural crest induction and Wnt-dependent emigration
Source: eLife journal article supplement (doi:10.7554/elife.57779), 2020-09-23

Figure 1 - figure supplement 1

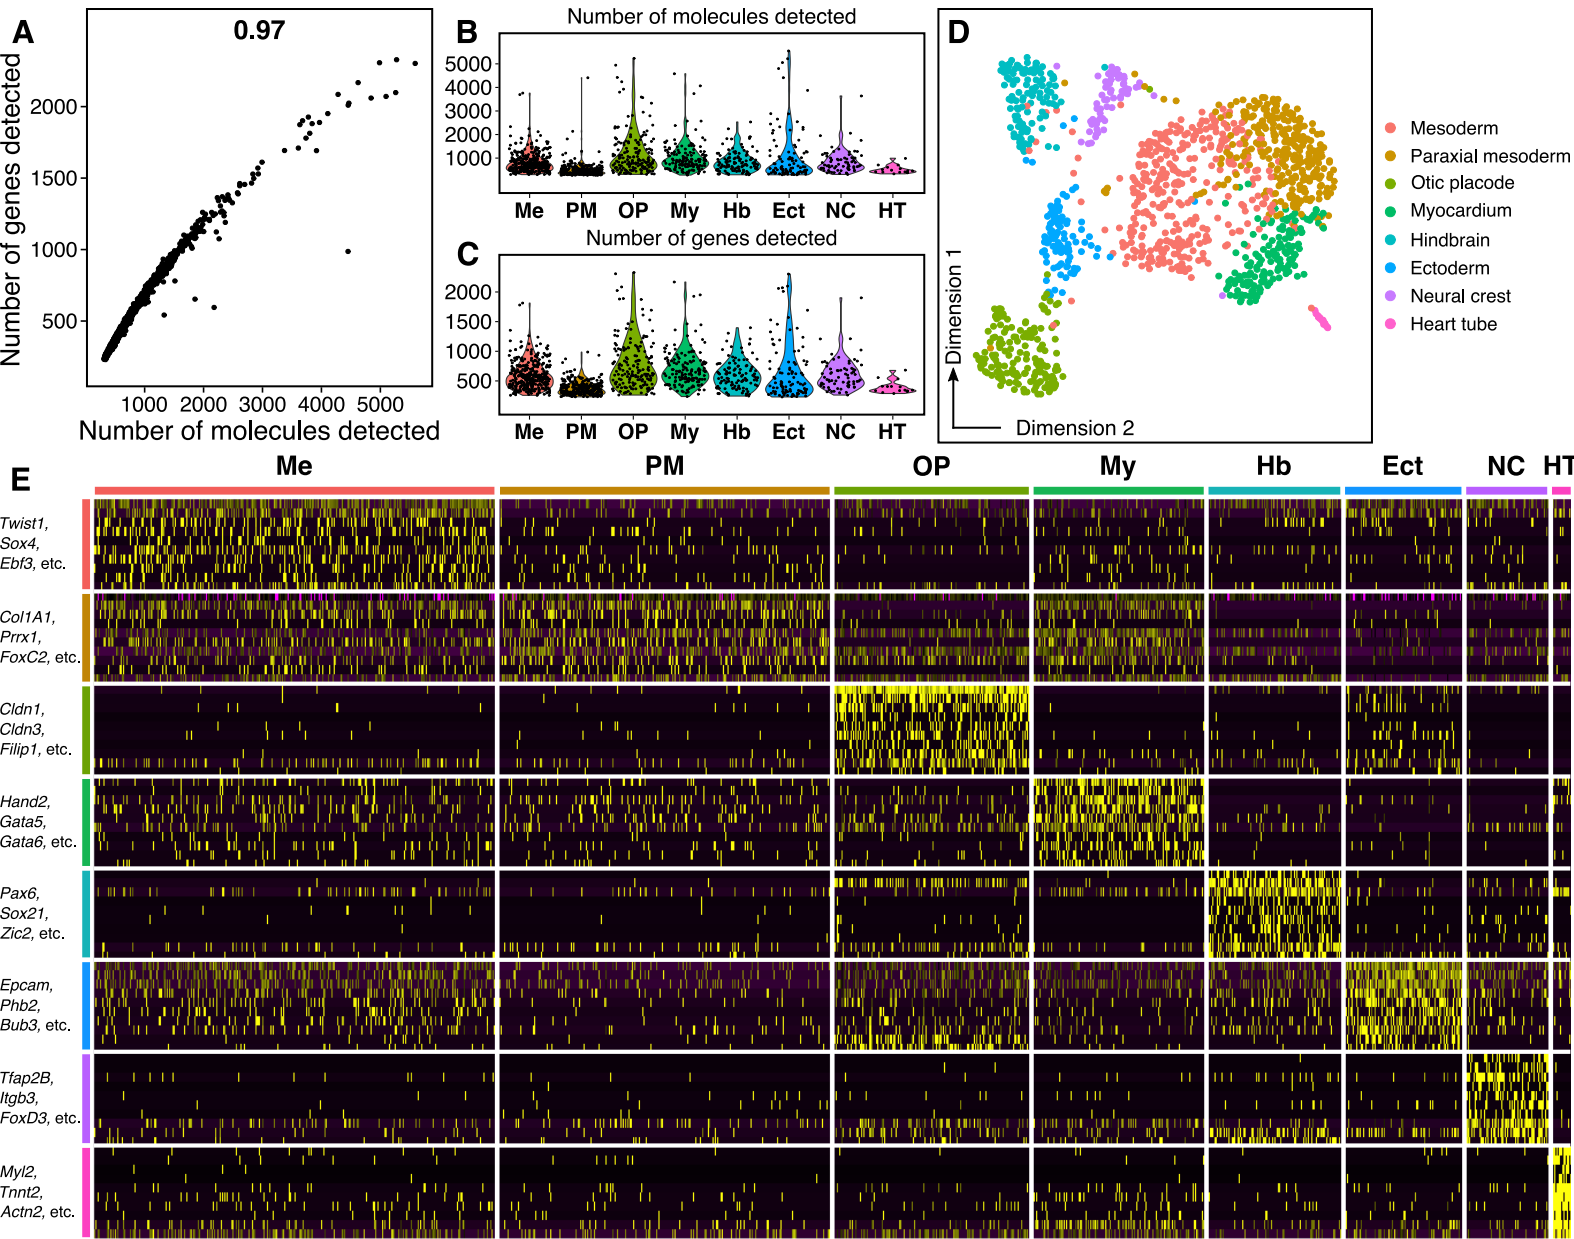

Supplement: supp [file elife_poa_e57779_Figure_1_figure_supplement_1.pdf › elife_poa_e57779_Figure_1_figure_supplement_1.pdf]

Figure 1 - figure supplement 2

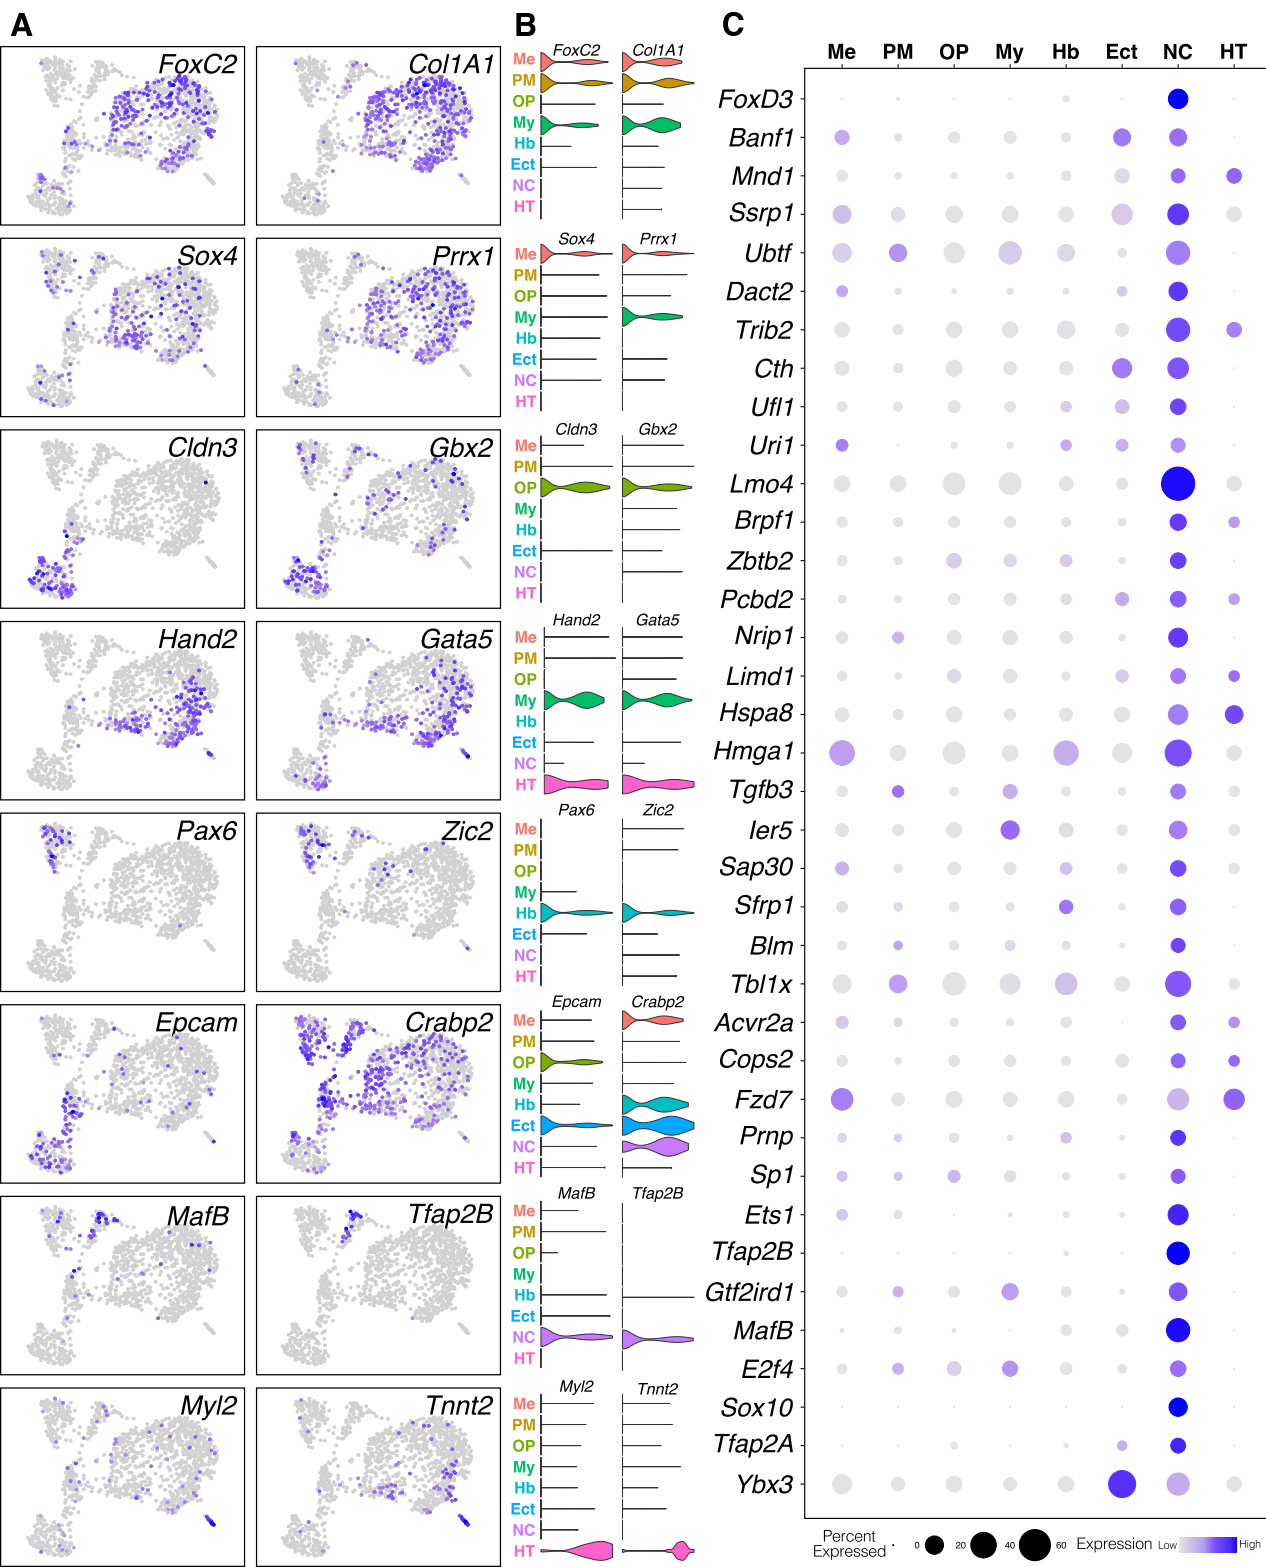

Supplement: supp [file elife_poa_e57779_Figure_1_figure_supplement_2.pdf › elife_poa_e57779_Figure_1_figure_supplement_2.pdf]

Figure 2 - figure supplement 1

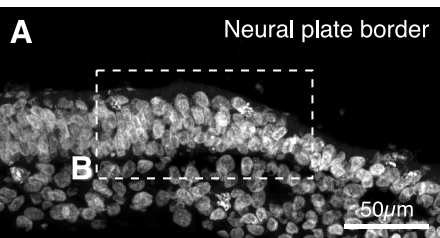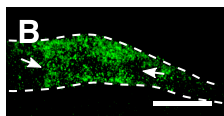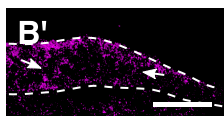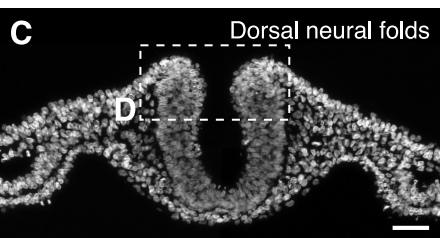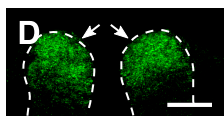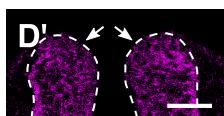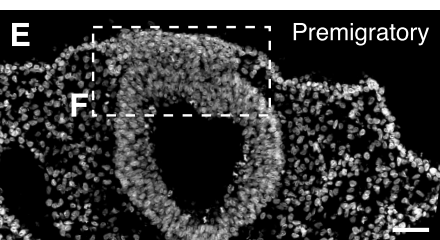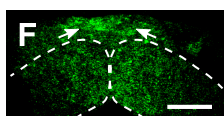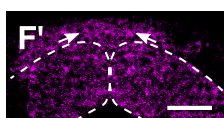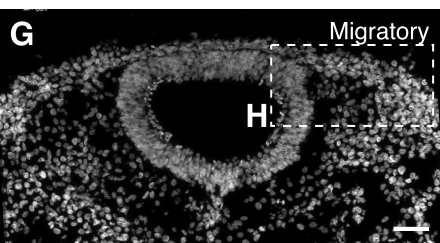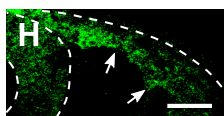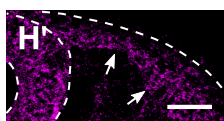

Supplement: supp [file elife_poa_e57779_Figure_2_figure_supplement_1.pdf › elife_poa_e57779_Figure_2_figure_supplement_1.pdf]

Figure 3 - figure supplement 1

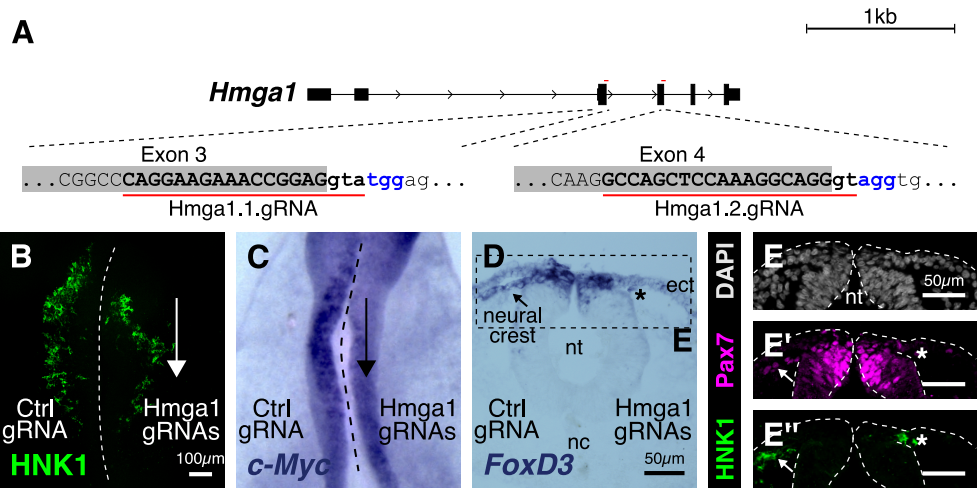

Supplement: supp [file elife_poa_e57779_Figure_3_figure_supplement_1.pdf › elife_poa_e57779_Figure_3_figure_supplement_1.pdf]

Figure 4 - figure supplement 1

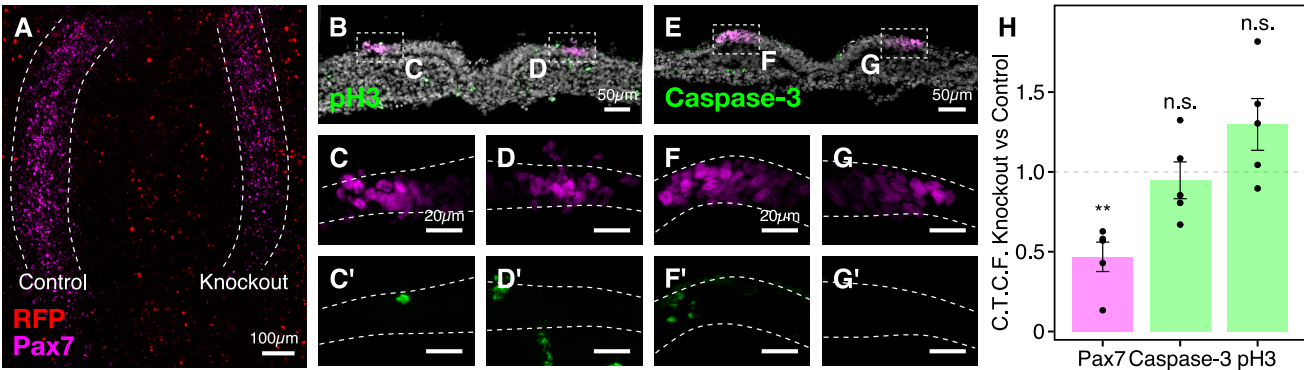

Supplement: supp [file elife_poa_e57779_Figure_4_figure_supplement_1.pdf › elife_poa_e57779_Figure_4_figure_supplement_1.pdf]

Figure 6 - figure supplement 1

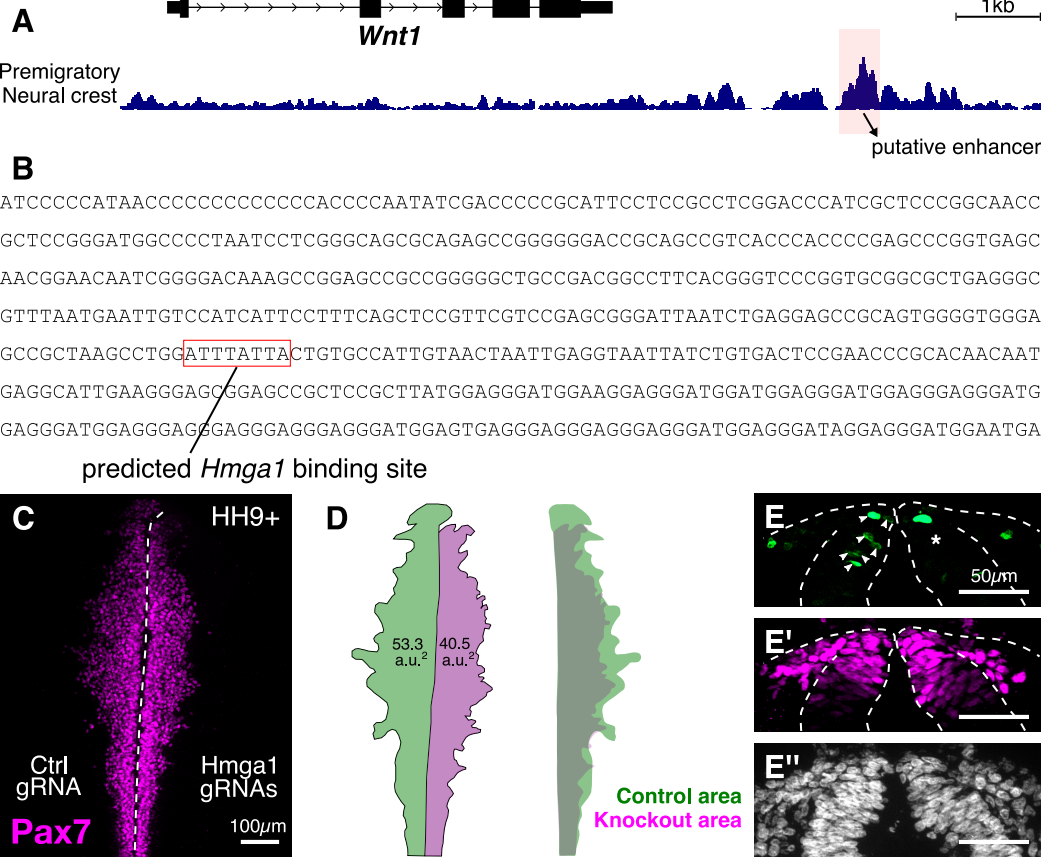

Supplement: supp [file elife_poa_e57779_Figure_6_figure_supplement_1.pdf › elife_poa_e57779_Figure_6_figure_supplement_1.pdf]
